1 A novel post hoc method for detecting index switching finds no evidence for increased switching  
2 on the Illumina HiSeq X.

3

4 Gregory L. Owens<sup>1</sup>, Marco Todesco<sup>1</sup>, Emily B. M. Drummond<sup>1</sup>, Sam Yeaman<sup>2</sup>, Loren H.  
5 Rieseberg<sup>1</sup>

6 1. Department of Botany and Beaty Biodiversity Centre, University of British Columbia, BC,  
7 Canada

8 2. Department of Biological Sciences, University of Calgary, Alberta, Canada

9

## 10 **Abstract**

11

12 High throughput sequencing using the Illumina HiSeq platform is a pervasive and critical  
13 molecular ecology resource, and has provided the data underlying many recent advances. A  
14 recent study has suggested that ‘index switching’, where reads are misattributed to the wrong  
15 sample, may be higher in new versions of the HiSeq platform. This has the potential to  
16 invalidate both published and in-progress work across the field. Here, we test for evidence of  
17 index switching in an exemplar whole genome shotgun dataset sequenced on both the Illumina  
18 HiSeq 2500, which should not have the problem, and the Illumina HiSeq X, which may. We  
19 leverage unbalanced heterozygotes, which may be produced by index switching, and ask  
20 whether the under-sequenced allele is more likely to be found in other samples in the same lane  
21 than expected based on the allele frequency. Although we validate the sensitivity of this method  
22 using simulations, we find that neither the HiSeq 2500 nor the HiSeq X have evidence of index  
23 switching. This suggests that, thankfully, index switching may not be a ubiquitous problem in  
24 HiSeq X sequence data. Lastly, we provide scripts for applying our method so that index  
25 switching can be tested for in other datasets.

26

## 27 **Introduction**

28

29 High throughput sequencing, primarily through the Illumina HiSeq platform, has revolutionized  
30 molecular ecology. In fact, 50% of original articles in a recent issue of *Molecular Ecology* (Vol  
31 26, Issue 2) included Illumina-derived sequence data. Researchers can now explore questions  
32 that were completely unanswerable before current sequencing technologies, using approaches  
33 such as genome scans, genome assembly and high density genetic mapping (e.g. Gould and  
34 Stinchcombe, 2017; Standage *et al.* 2016; Li *et al.* 2017). With the central role that sequencing

35 plays, it is alarming that a recent preprint suggests increased index switching on the new HiSeq  
36 4000 and HiSeq X machines (Sinha *et al.* 2017).

37

38 To prepare DNA for Illumina sequencing, strands are fragmented and adapter sequences are  
39 attached to the ends of these fragments. These adapters contain the sequence that binds to the  
40 flow cell, a primer sequence for amplification during sequencing and, potentially, a barcode  
41 index for linking reads to individual samples. Indexes are required when multiplexing samples  
42 within a single sequencing lane, and can be included in adapters at one or both ends of the  
43 DNA fragments. As the output of a single sequencing lane has increased, multiplexing has  
44 become increasingly common. This is especially true in molecular ecology, where researchers  
45 often aim to maximize sample size by using low coverage whole genome data (Buerkle and  
46 Gompert 2013). For example, a single lane on the HiSeq 4000 can sequence 200 stickleback  
47 genomes (~460MB) to 1x coverage. Consequently, it is critical that samples are correctly  
48 demultiplexed or the resulting sequence data will contain mixes of reads from unexpected and  
49 unpredictable sources.

50

51 A recent preprint by Sinha *et al.* reports high levels of index switching in a single cell RNAseq  
52 experiment (Sinha *et al.* 2017). They dual indexed (i.e. barcodes on both adapters) all samples  
53 using a Nextera XT kit and found that samples that shared a single index had greater similarity  
54 in gene expression levels than expected. The authors attributed this to index switching, and  
55 showed that controls containing adapters and index primers but no template DNA still had reads  
56 assigned to them, receiving 5-7% of the average number of reads of samples with template  
57 DNA as a result of index switching. They proposed that index switching occurs during cluster  
58 generation (before sequencing) when free index primers replicate already indexed library  
59 fragments. These newly copied fragments will then carry one wrong index and be misattributed  
60 to another sample. Importantly, they find that this only occurs on the Illumina HiSeq 4000, which  
61 uses a patterned flow cell and a new exclusion amplification (ExAmp) chemistry, and not in the  
62 NextSeq 500, which does not. Both the HiSeq 4000 and HiSeq X use a patterned flow cell and  
63 the cBot 2 system for cluster generation, suggesting that the problem may occur in both  
64 machines. Illumina has acknowledged that index switching can occur and is higher in machines  
65 that use a patterned flow cell, but suggests total index switching is >2% of reads (Illumina,  
66 2017).

67

68 In light of the potential problems, we explored a set of whole genome sequenced samples, half  
69 of which were sequenced on the HiSeq 2500, which does not use the patterned flow cell and  
70 ExAmp chemistry, and half on the HiSeq X, which does. We have developed a novel method for  
71 detecting index switching in genomic datasets and show that in our samples index switching is  
72 minimal and not enriched in the HiSeq X.

73

74

## 75 **Methods**

76

### 77 *Study species and library preparation*

78 To identify whether index switching was detectable in an average whole genome sequence  
79 dataset, we analyzed a set of 323 wild *Helianthus annuus* (common sunflower) whole genome  
80 sequence samples. Plants were grown from field-collected seeds obtained from 28 populations  
81 located across the Midwestern USA and Southern Canada. Genomic DNA was extracted from  
82 frozen leaf tissue using either a modified CTAB protocol (based on Murray and Thompson,  
83 1980), the DNeasy Plant Mini Kit or a DNeasy 96 Plant Kit (Qiagen, Hilden, Germany). DNA  
84 was sheared to an average fragment size of 350 bp using a Covaris M220 ultrasonicator  
85 (Covaris, Woburn, Massachusetts, USA), following the manufacturer's recommendations. 750  
86 ng of sheared DNA were used as starting material to prepare paired-end whole-genome  
87 shotgun Illumina libraries, using a protocol largely based on Rowan *et al*, 2015, the TruSeq DNA  
88 Sample Preparation Guide from Illumina (Illumina, San Diego, CA, USA) and Rohland and  
89 Reich, 2012. End-repairing of the sheared DNA fragments was performed using the NEBNext  
90 End Repair Module (NEB, Ipswich, Massachusetts, USA). The fragments were then A-tailed  
91 using Klenow Fragment (3'-->5'exo-) from NEB and ligated to 24-bp-long, non-barcoded  
92 adapters with a 3' T-overhang (Table S1) using the Quick Ligation Kit from NEB. After each  
93 enzymatic step, the reactions were purified using 1.6 volumes of a solution of paramagnetic  
94 SPRI beads (MagNA), prepared according to Rohland and Reich, 2012. An enrichment step  
95 was then performed using KAPA HiFi HotStart ReadyMix (Roche, Basel, Switzerland) and short,  
96 non-indexed primers that do not extend the adapters (Table S1). The reactions were then  
97 purified using 1.6 volumes of MagNA beads. The sunflower genome contains a very large  
98 amount of highly repetitive sequences derived from the recent expansion of two retrotransposon  
99 families (Staton *et al.* 2012). In order to reduce the representation of repetitive sequences, the  
100 enriched libraries were treated with a Duplex-Specific Nuclease (DSN; Evrogen, Moscow,  
101 Russia), following the protocols reported in Shagina *et al.* 2010 and Matvienko *et al.* 2013, with

102 modifications. The fragments were then further amplified using Kapa HiFi HotStart ReadyMix  
103 and primers (to a final concentration of 0.4  $\mu$ M each) to complete the adapters and add a six-bp  
104 index to the P7 adapter (Table S1). The sequence of the completed adapters is identical to that  
105 Illumina's TruSeq adapters.

106  
107 After amplification, the libraries were purified twice with 1.6 volumes of MagNA beads,  
108 quantified using a QuBit dsDNA Broad Range Assay Kit (Invitrogen, Carlsbad, California, USA)  
109 and analyzed on a 2100 Bioanalyzer instrument using a High Sensitivity DNA Analysis Kit  
110 (Agilent, Santa Clara, California, USA). The libraries were then quantified on an iQ5 Real Time  
111 PCR Detection System (Bio-Rad, Hercules, California, USA) using Maxima SYBR Green qPCR  
112 Master Mix (ThermoFisher Scientific, Waltham, Massachusetts, USA) to determine molarity, and  
113 pools consisting of ten libraries each were prepared. All libraries were sequenced at the  
114 Genome Québec Innovation Center; 156 libraries were sequenced on a HiSeq 2500 instrument  
115 and 165 were sequenced on a HiSeq X instrument (Illumina, San Diego, CA, USA). Importantly,  
116 samples were multiplexed within lanes in a random manner without regard to population ID.

117  
118 *Variant calling*

119 We aligned all samples to the *H. annuus* XRQ genome using BWA (version 0.7.9a), removed  
120 PCR duplicates using samtools and called variants using FreeBayes (version 1.1.0) (Li and  
121 Durbin 2010; Li *et al.*, 2009; Garrison and Marth 2012). In all cases, we used default  
122 parameters. For this analysis, we selected di-allelic SNPs with QUAL > 30 using vcfliib  
123 (<https://github.com/ekg/vcfliib>).

124  
125 *Testing for index switching*

126 To identify whether index switching is increased in samples sequenced on the HiSeq X, we  
127 leveraged the fact that individual samples in our dataset were either sequenced on the HiSeq X  
128 or the HiSeq 2500. Therefore, we can not only estimate index switching rates on the HiSeq X,  
129 but also tell if it is higher than for previous technology.

130  
131 Previous work has suggested that index switching is occurring for 1-10% of reads depending on  
132 factors during library preparation and sequencing (Sinha *et al.* 2017). This low level means that,  
133 for our dataset, at a single locus, an allele acquired because of index switching is likely to only  
134 have one read, given moderate overall read depth. We looked for these unbalanced  
135 heterozygotes (i.e. one read for allele 1, many reads for allele 2) and asked if the rare allele

136 (i.e., the under-sequenced allele) was found in other samples sequenced in the same lane  
137 (which we refer to as “allele sharing”). We then calculated  $\hat{p}$ , the probability that the rare allele  
138 should be found in those samples based on  $f$ , the allele frequency for all samples sequenced  
139 with that machine (excluding the unbalanced focal individual) and  $n$ , the number of other  
140 samples with genotypes in the lane (1).

$$141 \quad \hat{p} = 1 - (1 - f)^{2n} \quad (1)$$

142 We then plotted  $\hat{p}$ , the predicted proportion of cases where the allele is present in at least one  
143 copy in the other samples from the lane, against  $p$ , the observed proportion of cases with allele  
144 sharing. We fit a line to this relationship using a generalized additive model in the *stat\_smooth*  
145 command from *ggplot2* (Wickham, 2016). If index switching is not occurring, we expect a  
146 straight line at  $\hat{p} = p$ . Alternatively, if index switching is occurring, we expect  $p > \hat{p}$  indicating  
147 greater sharing of under-sequenced alleles within a lane than expected by chance. These  
148 proportions were calculated independently for HiSeq 2500 and HiSeq X samples, using the first  
149 500,000 variable sites in the genome.

150

151 As a control, for each unbalanced heterozygote we calculated the  $p$  using the same number of  
152 genotyped samples sequenced using the same machine, but not the same lane. This control  
153 should not show evidence of index switching.

154

155 It's important to note that if samples were sorted into sequencing lanes based on a genetic  
156 grouping (e.g. species or population), we would find  $p > \hat{p}$  in the absence of index switching. In  
157 our dataset this is not the case, as samples were randomly assigned into lanes.

158

### 159 *Simulations*

160 To explore the sensitivity of our measure of index switching, we bioinformatically switched reads  
161 in our vcf file, randomly selecting 0, 0.1, 0.5, 1, 5, or 10 percent of reads at each site across all  
162 individuals to be switched. Switched reads were removed from the individual (i.e. reducing read  
163 depth) and added to another individual sequenced in the same lane (i.e. increasing read depth).  
164 We then recalculated genotypes simply by assigning samples containing reads for both alleles  
165 as heterozygotes. These simulations were run through the same algorithm to detect index  
166 switching.

167

### 168 *Data availability*

169 All scripts used in this manuscript are available on github  
170 ([https://github.com/owensgl/index\\_investigator](https://github.com/owensgl/index_investigator)) along with a dataset containing lane identifiers,  
171 genotypes and read depths for samples used in this study.

172

## 173 **Results**

174 We fail to find evidence that index switching is occurring in our dataset. For samples sequenced  
175 on both machines, the observed proportion of allele sharing within a lane tracked the predicted  
176 proportion closely (Figure 1, Supplementary figure 1). This was consistent with the pattern seen  
177 in our control that used samples from different lanes. Despite this, we find that our method is  
178 able to identify index switching in the simulated dataset. In particular, we find elevated allele  
179 sharing around  $\hat{p}=0.2$ , even when index switching only represents 1% of reads (Figure 2). In  
180 our dataset,  $\hat{p}=0.2$  corresponds to rare alleles (minor allele frequency < 5%). This makes sense  
181 because common alleles are expected to have high allele sharing even in the absence of index  
182 switching which makes the signal more difficult to observe.

183

## 184 **Discussion**

185 Widespread, undetected index switching represents a nightmare scenario for molecular  
186 ecologists worldwide. Here we show that in one exemplar dataset, index switching is not higher  
187 in samples sequenced on the new patterned flowcells and is likely below 1% of reads.  
188 Furthermore, we provide a way to visualize index switching for sequenced genomic datasets.

189

### 190 *Why don't we find index switching?*

191 Our results are clearly different from Sinha *et al.*, who found index switching affecting 5-10% of  
192 reads. This could potentially be caused by differences in sequencing library preparation. Sinha  
193 *et al.* used cDNA as starting material and the Nextera tagmentation technology from Illumina to  
194 fragment the DNA and tag the fragments with adapters, whereas we used genomic DNA  
195 sheared using ultrasonication and then added the adapters to the fragments via enzymatic  
196 ligation. Furthermore, our protocol included a depletion step, to reduce repetitive elements in the  
197 genome, that is not present in the Nextera XT protocol. However, the final step of library  
198 preparation is substantially equivalent between the two approaches; DNA fragments with short  
199 adapters at their extremities are PCR-amplified using primers that complete the adapters and  
200 add unique sequence indices, allowing pooling of different samples in a single flow cell. Given  
201 that carry-over of free indexed primers from this step is the likely cause of index switching

202 during the ExAmp procedure (Sinha *et al.* 2017), the two approaches can be confidently  
203 compared for the purpose of investigating the occurrence of index switching.

204

205 Another possible difference between the two experiments is that, while the Nextera XT kit uses  
206 dual indices (i.e. both the P5 and P7 adapters are indexed), we used only a single index on the  
207 P7 adapter. This has the potential to halve index switching in our dataset, assuming that  
208 switching occurs equally from both adapters. If the unindexed P5 adapter were to be replaced in  
209 our dataset, this would not result in index switching because no index is present. For a dual  
210 indexed library, it would result in index switching.

211

212 Finally, the main difference we noticed between our libraries and the one shown in Figure 4B of  
213 Sinha *et al.* is the large amount of free adapters/primers that are found in the latter (compare  
214 with the Bioanalyzer plot for one of our libraries in Figure 3a). Our enhanced cleanup efficiency  
215 could be due to fact that, while the Nextera XT kit recommends a single cleanup step with 0.6  
216 volumes of Agencourt AMPure XP beads, we performed two rounds of cleanup with 1.6  
217 volumes of MagNA beads (the maximum size of the fragments that are removed during beads  
218 cleanup is, roughly, inversely proportional to the ratio of bead solution that is added to the  
219 reaction - smaller volumes of beads should therefore be more efficient at removing free  
220 adapter/primers). However, a single cleanup with 1 volume of MagNA beads was sufficient to  
221 completely remove primers/adapters from our libraries (Figure 3b). MagNA and AMPure XP  
222 beads have been shown to have comparable recovery efficiency and size discrimination  
223 (Rohland and Reich, 2012), and this is confirmed by our experience. While it is possible that,  
224 because of their different design, libraries produced using the Nextera XT protocol simply  
225 contain a much larger amount of free adapters/primers that cannot be efficiently removed with  
226 one single cleanup step, we did not directly test this.

227

228 *When is index switching confounding?*

229 Certain kinds of experiments are more likely to be affected index switching. Gene expression  
230 quantification using RNAseq is especially sensitive because highly expressed genes can bleed  
231 into other samples, homogenizing expression measures with lanes. In cancer genomics, low  
232 frequency alleles represented by a minority of reads are both important and can be produced by  
233 index switching. Similar issues can occur in Pool-seq experiments used in molecular ecology,  
234 where index switching could affect estimation of allele frequencies, slightly homogenizing  
235 differences among pools sequenced in the same lane.



236

237 For high coverage genomic sequencing of diploid organisms, index switching can produce  
238 unbalanced heterozygotes, where one allele is represented by one or two reads and the other  
239 by many reads. These present a genotyping challenge because unbalanced heterozygotes can  
240 also be produced naturally by stochastic sampling of alleles or via PCR bias during library prep.  
241 Future genotyping programs may use haplotype information of reads along with sequencing  
242 lane identity to detect when index switching is occurring and remove contaminants. In low-  
243 coverage genome sequencing, identifying individual instances of index switching may be  
244 impossible and will result in an increased rate of false heterozygote genotype calls (when an  
245 index is switched among alternate homozygotes) and slightly increased quality scores for  
246 heterozygotes mis-called as homozygotes (when all sequenced reads represent only one allele  
247 of the heterozygote and an index is switched from a homozygote with the same allele).

248

249 Which samples are multiplexed in a lane has a large effect on whether index switching is a  
250 problem. If each sample represents a distinct, distantly related species, then misattributed reads  
251 are unlikely to align to a reference genome. If all samples are from a single population,  
252 misattributed reads are more likely to carry alleles already present. In the worst case scenario,  
253 samples of closely related species or distantly related populations with misattributed reads could  
254 be mistakenly inferred as novel alleles. This could reduce divergence estimates like  $F_{ST}$  or  
255 confuse phylogenetic signals. Although stringent allelic balance cut offs for heterozygous  
256 genotypes would remove the false heterozygotes from index switching, it may also remove true  
257 heterozygotes or miscall them as homozygotes, especially at lower (<10) average read depth.

258

259 *Best practices to avoid index switching.*

260 Although we failed to detect index switching here, it may be prudent to employ techniques for  
261 avoiding the issue. Two main suggestions have been proposed: (1) using dual index barcodes,  
262 so that both indices are unique to a sample and (2) thoroughly cleaning library preparations to  
263 remove free primers. Beyond this, researchers should be more aware of what samples are  
264 multiplexed together, a process that is often determined by the sequencing facility without  
265 regard for sample identity.

266

## 267 **Conclusion**

268 We have failed to find evidence for index switching here, but we certainly do not make the claim  
269 that it cannot or does not happen. However, we would like to make two points: (1) index



270 switching does not always occur and (2) that vigilance is necessary. With greater attention to  
271 this problem, research labs and companies can spend time and effort creating molecular  
272 protocols to reduce this issue and bioinformatic programs to detect or remove misattributed  
273 reads. Like all genotyping methods, errors are inevitable, but by better understanding their  
274 source we can sort signal from noise.

275

276

277

## 278 **References**

279

280 Buerkle, A. C. and Gompert, Z. (2013). Population genomics based on low coverage  
281 sequencing: how low should we go?. *Mol Ecol*, 22(11), 3028-3035.

282

283 Garrison E. and Marth G. (2012) Haplotype-based variant detection from short-read  
284 sequencing. arXiv preprint arXiv:1207.3907 [q-bio.GN]

285

286 Gould, B. A. and Stinchcombe, J. R. (2017), Population genomic scans suggest novel genes  
287 underlie convergent flowering time evolution in the introduced range of *Arabidopsis thaliana*.  
288 *Mol Ecol*, 26: 92–106. doi:10.1111/mec.13643

289

290 Illumina Inc. (2017) Effects of index misassignment on multiplexing and downstream analysis.

291

292 Li H. and Durbin R. (2010) Fast and accurate long-read alignment with Burrows-Wheeler  
293 transform. *Bioinformatics*, 26, 589–595.

294

295 Li H., Handsaker B., Wysoker A., Fennell T., Ruan J., Homer N., ... 1000 Genome Project Data  
296 Processing Subgroup (2009) The Sequence alignment/map (SAM) format and SAMtools.  
297 *Bioinformatics*, 25, 2078-2079

298

299 Li, Z., Guo, B., Yang, J., Herczeg, G., Gonda, A., Balázs, G., Shikano, T., Calboli, F. C. F. and  
300 Merilä, J. (2017), Deciphering the genomic architecture of the stickleback brain with a novel  
301 multilocus gene-mapping approach. *Mol Ecol*, 26: 1557–1575. doi:10.1111/mec.14005

302

303 Matvienko M., Kozik A., Froenicke L., Lavelle D., Martineau B., Perroud B. and Michelmore, R.  
304 (2013). Consequences of normalizing transcriptomic and genomic libraries of plant genomes  
305 using a duplex-specific nuclease and tetramethylammonium chloride. *PLoS ONE*, 8(2): e55913.

306

307 Murray M.G. and Thompson W.F. (1980). Rapid isolation of high molecular weight plant DNA.  
308 *Nucleic Acid Res.*, 8(19); 4321-4325.

309

310 Rohland N. and Reich D. (2012). Cost-effective, high-throughput DNA sequencing libraries for  
311 multiplexed target capture. *Genome Res.*, 22(5): 939-946.

312  
313 Rowan B.A., Patel V., Weigel D. and Schneeberger K. (2015). Rapid and inexpensive whole-  
314 genome Genotyping-by-Sequencing for crossover localization and fine-scale genetic mapping.  
315 *G3*, 5(3): 385-398.  
316  
317 Shagina, I., Bogdanova, E., Mamedov, I. Z., Lebedev, Y., Lukyanov, S., & Shagin, D. (2010).  
318 Normalization of genomic DNA using duplex-specific nuclease. *Biotechniques*, 48(6), 455.  
319  
320 Sinha R., Stanley G., Gulati G. S. , Ezran C., Travaglini K. J. , Wei E., ... Weissman I. L. (2017)  
321 Index switching causes “spreading-of-signal” among multiplexed samples in Illumina HiSeq  
322 4000 DNA sequencing. bioRxiv 125724; doi: <https://doi.org/10.1101/125724>  
323  
324 Standage, D. S., Berens, A. J., Glastad, K. M., Severin, A. J., Brendel, V. P. and Toth, A. L.  
325 (2016), Genome, transcriptome and methylome sequencing of a primitively eusocial wasp  
326 reveal a greatly reduced DNA methylation system in a social insect. *Mol Ecol*, 25: 1769–1784.  
327  
328 Staton S.E., Bakken B.H., Blackman B.K., Chapman M.A., Kane N.C., Tang S., ... Burke J.M.  
329 (2012). The sunflower (*Helianthus annuus* L.) genome reflects a recent history of biased  
330 accumulation of transposable elements. *Plant J.*, 72(1): 142-153.  
331  
332 Wickham, H. (2016). *ggplot2: elegant graphics for data analysis*. Springer.

333  
334  
335

## 336 **Figures**

337  
338 Figure 1. (a) The relationship between predicted allele sharing and observed allele sharing for  
339 samples sequenced on the HiSeq 2500 (solid line) and HiSeq X (dashed line). Allele sharing  
340 was calculated for samples sequenced together in a lane (blue) and for a control group  
341 sequenced in different lanes (red).

342  
343 Figure 2. The relationship between predicted allele sharing and observed allele sharing with  
344 different degrees of simulated index switching. The 0% index switching test controls for the re-  
345 calling of genotypes that occurs during simulated index switching. Allele sharing was calculated  
346 for samples sequenced together in a lane (blue) and for a control group sequenced in different  
347 lanes (red).

348  
349 Figure 3. Bioanalyzer plots for representative whole genome shotgun sequencing libraries used  
350 in this study, after the final amplification and cleanup step. The plot shows the abundance of  
351 fragments of different sizes in the library (measured in fluorescence units, FU). The peaks at 35

352 bp (green) and 10,380 bp (purple) are internal standards. Free index primers should appear as  
353 a peak at ~50 bp. a) Library that underwent two rounds of cleanup after PCR amplification, each  
354 using 1.6 volumes of MagNA beads. b) Library that underwent a single round of cleanup with 1  
355 volume of MagNA beads.

356

357 Supplementary Figure 1. A stacked histogram of the allele sharing presence/absence at  
358 different  $\hat{p}$  values for within lane samples (a) and control samples (b). This is the raw data used  
359 to produce Figure 1. The difference in heights between HiSeq 2500 and HiSeq X reflects  
360 differences in sequencing depth and multiplex pooling. The HiSeq X produced more reads, less  
361 missing data and more unbalanced heterozygotes.

362

363

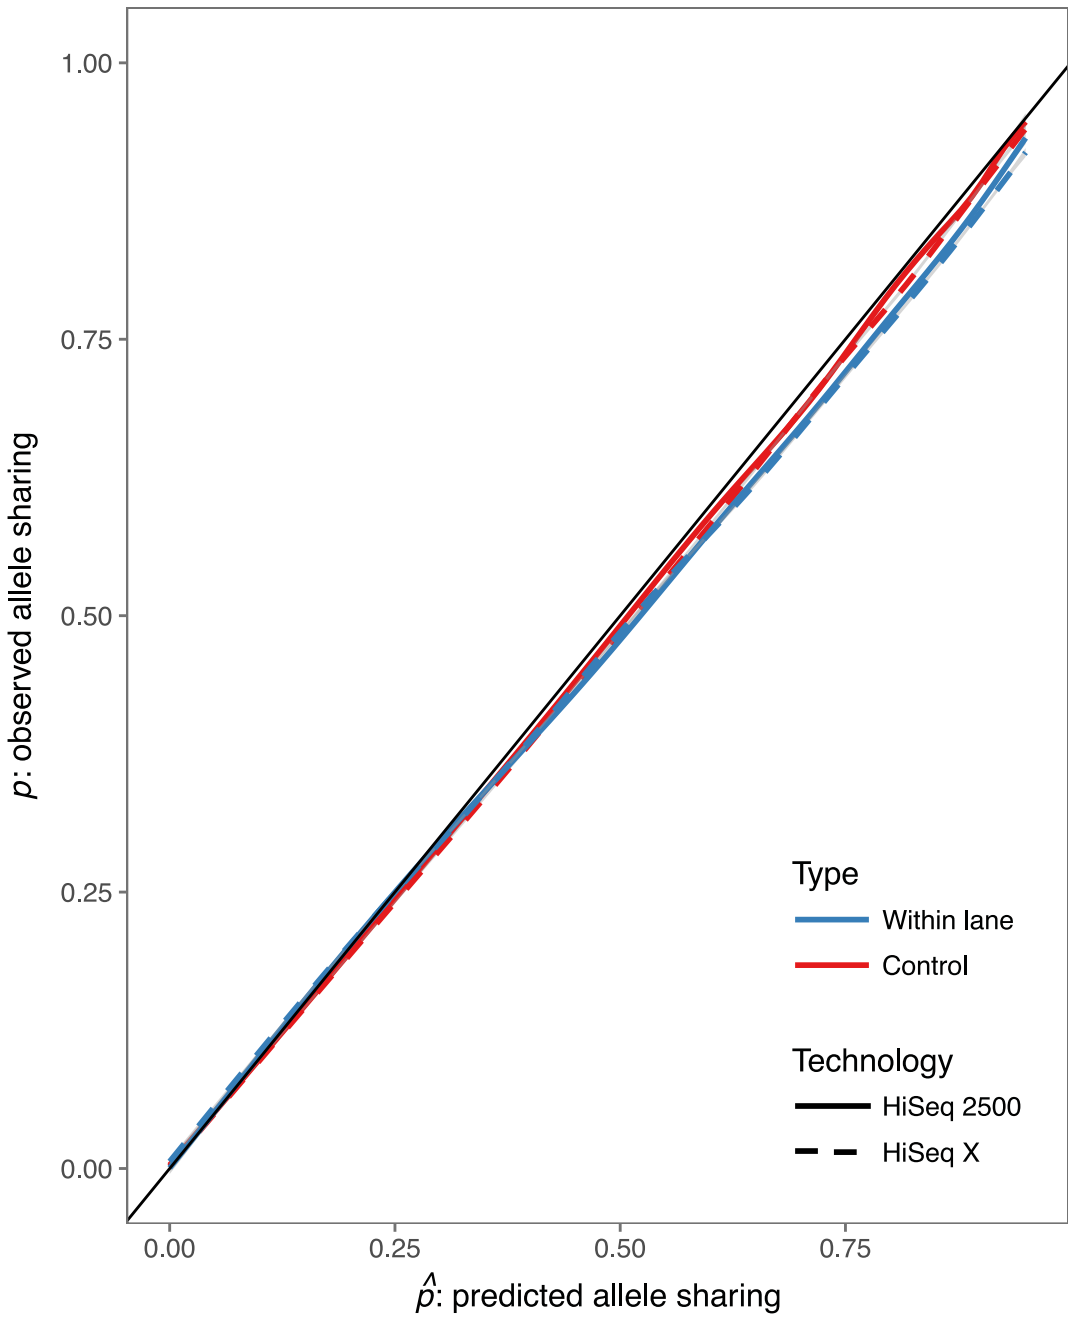

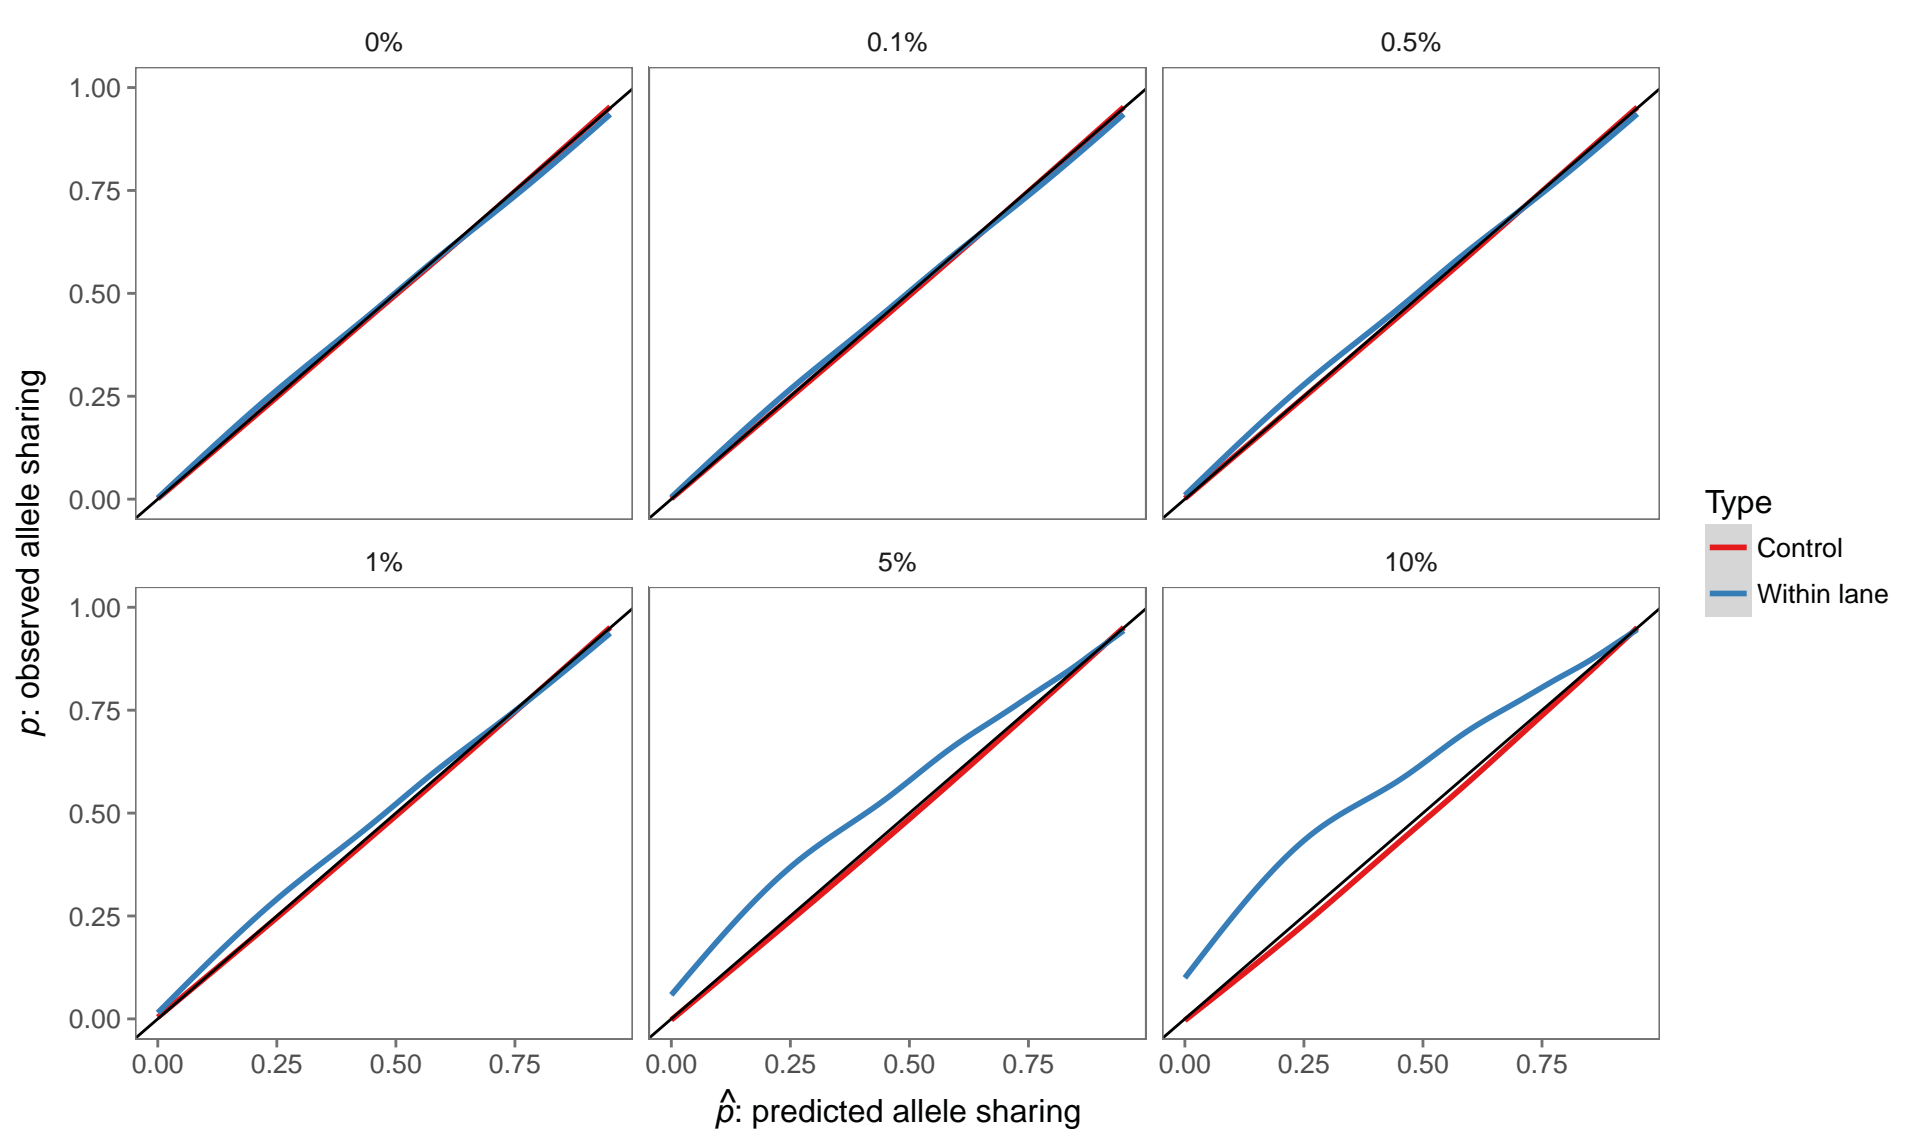

**a)**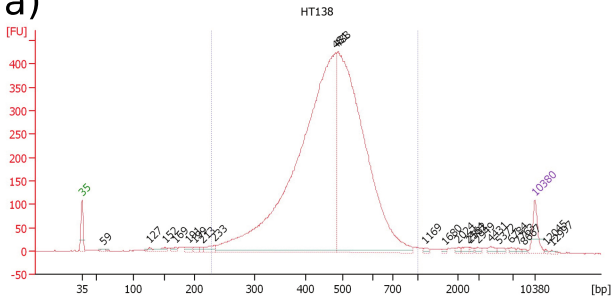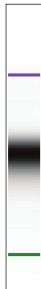**b)**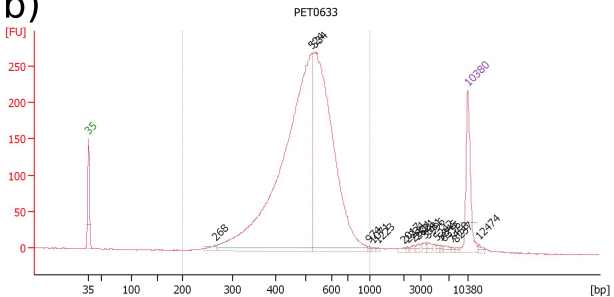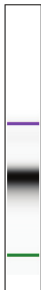

Source: http://biorxiv.org/content/10.1101/142356v1.full.pdf
